# Supplementary material for: Study on Italian Onion Cultivars/Ecotypes towards Onion Yellow Dwarf Virus (OYDV) Infection
Source: MDPI journal article supplement (doi:10.3390/horticulturae10010073), 2024-01-11
Supplement: s1 [file s1]

**Supplementary Table 1.** Length of fragments obtained from the analysis of onion cultivars/ecotypes by Genemapper v.5

| ID                          | ACM 373 | ACM 373 | ACM 101 | ACM 101 | ACM 235 | ACM 235 | ACM 446 | ACM 446 | ACM 449 | ACM 449 | ACM 045 | ACM 045 |
|-----------------------------|---------|---------|---------|---------|---------|---------|---------|---------|---------|---------|---------|---------|
| Acquaviva 7                 | 83      | 119     | 208     | 208     | 271     | 271     | 91      | 94      | 116     | 120     | 243     | 246     |
| Rosa o Dorata Di Monteleone | 98      | 98      | 211     | 211     | 271     | 271     | 91      | 91      | 114     | 120     | 243     | 243     |
| Bianca Di Margherita        | 102     | 102     | 208     | 208     | 278     | 278     | 92      | 94      | 112     | 120     | 239     | 239     |
| Pera Sanguigna Di Peschici  | 102     | 104     | 202     | 210     | 277     | 277     | 92      | 94      | 104     | 114     | 240     | 244     |
| Bianca Di Castrovillari     | 100     | 100     | 208     | 212     | 278     | 278     | 82      | 94      | 114     | 114     | 240     | 240     |
| Rossa Di Margherita         | 84      | 84      | 211     | 211     | 277     | 277     | 94      | 96      | 104     | 114     | 240     | 244     |
| Dorata d'Ozieri             | 84      | 92      | 200     | 208     | 277     | 277     | 91      | 91      | 114     | 118     | 244     | 244     |
| Giarratana                  | 98      | 104     | 208     | 208     | 278     | 278     | 91      | 94      | 114     | 120     | 240     | 242     |
| Ramata Di Montoro           | 96      | 98      | 208     | 217     | 278     | 278     | 91      | 94      | 112     | 114     | 240     | 242     |
| Texas early grano 502       | 102     | 103     | 211     | 217     | 278     | 278     | 92      | 96      | 104     | 114     | 237     | 240     |
| Dorata Di Voghera           | 95      | 96      | 208     | 211     | 271     | 271     | 82      | 91      | 112     | 114     | 237     | 244     |
| Rossa Di Breme              | 102     | 102     | 211     | 217     | 278     | 278     | 91      | 94      | 101     | 114     | 240     | 242     |
| Paglierina Di Sermide       | 106     | 106     | 211     | 217     | 273     | 273     | 92      | 92      | 104     | 104     | 240     | 244     |
| Rossa di Tropea (RC)        | 104     | 104     | 208     | 211     | 278     | 278     | 94      | 96      | 112     | 112     | 240     | 242     |
| Rossa di Tropea (VV)        | 72      | 83      | 208     | 211     | 270     | 278     | 92      | 94      | 104     | 112     | 240     | 244     |

| ID                          | ACM 138 | ACM 138 | ACM 387 | ACM 387 | ACM 134 | ACM 134 | ACM 119 | ACM 119 | ACM 443 | ACM 443 | ACM 477 | ACM 477 |
|-----------------------------|---------|---------|---------|---------|---------|---------|---------|---------|---------|---------|---------|---------|
| Acquaviva 7                 | 218     | 230     | 126     | 135     | 169     | 176     | 240     | 255     | 225     | 229     | 130     | 134     |
| Rosa o Dorata Di Monteleone | 218     | 240     | 134     | 134     | 181     | 181     | 236     | 236     | 127     | 129     | 129     | 129     |
| Bianca Di Margherita        | 218     | 230     | 136     | 136     | 177     | 181     | 240     | 240     | 126     | 126     | 129     | 129     |
| Pera Sanguigna Di Peschici  | 213     | 222     | 134     | 134     | 161     | 169     | 236     | 236     | 127     | 127     | 134     | 134     |
| Bianca Di Castrovillari     | 250     | 250     | 130     | 136     | 181     | 181     | 227     | 227     | 127     | 127     | 126     | 131     |
| Rossa Di Margherita         | 300     | 320     | 121     | 123     | 176     | 180     | 226     | 234     | 126     | 126     | 124     | 130     |
| Dorata d'Ozieri             | 221     | 230     | 135     | 135     | 171     | 181     | 235     | 235     | 122     | 126     | 126     | 131     |
| Giarratana                  | 218     | 250     | 135     | 135     | 181     | 181     | 236     | 236     | 127     | 129     | 130     | 134     |
| Ramata Di Montoro           | 209     | 217     | 128     | 135     | 167     | 176     | 235     | 235     | 126     | 127     | 126     | 132     |
| Texas early grano 502       | 222     | 230     | 133     | 136     | 167     | 176     | 227     | 235     | 124     | 126     | 130     | 134     |
| Dorata Di Voghera           | 218     | 230     | 126     | 135     | 169     | 176     | 240     | 255     | 225     | 229     | 130     | 134     |
| Rossa Di Breme              | 218     | 240     | 134     | 134     | 181     | 181     | 236     | 236     | 127     | 129     | 129     | 129     |
| Paglierina Di Sermide       | 218     | 230     | 136     | 136     | 177     | 181     | 240     | 240     | 126     | 126     | 129     | 129     |
| Rossa di Tropea (RC)        | 213     | 222     | 134     | 134     | 161     | 169     | 236     | 236     | 127     | 127     | 134     | 134     |
| Rossa di Tropea (VV)        | 250     | 250     | 130     | 136     | 181     | 181     | 227     | 227     | 127     | 127     | 126     | 131     |

| SSR     | Size obtained | SSR     | Size obtained |
|---------|---------------|---------|---------------|
| ACM 373 | 72-119        | ACM 138 | 209-320       |
| ACM 101 | 200-217       | ACM 387 | 121-136       |
| ACM 235 | 270-278       | ACM 134 | 161-181       |
| ACM 446 | 82-96         | ACM 119 | 226-255       |
| ACM 449 | 101-120       | ACM 443 | 122-229       |
| ACM 045 | 237-246       | ACM 477 | 124-135       |
